# Supplementary material for: A timeline of bacterial and archaeal diversification in the ocean
Source: eLife journal article supplement (doi:10.7554/elife.88268), 2023-06-06
Supplement: supp2 [file elife-88268-supp2-v1.pdf]

((((RS.GCF.006274605.1.protein:2739.07000,  
(GB.GCA.001587575.1.protein:2205.88000,GB.GCA.004212155.1.protein:2205  
.88000)Node\_1065:533.18400)Node\_1064:355.58700,  
(RS.GCF.000018485.1.protein:1726.79000,RS.GCF.000025525.1.protein:172  
6.79000)Node\_1067:1190.81000,(RS.GCF.000166095.1.protein:1900.51000,  
(GB.GCA.003584625.1.protein:1130.17000,  
(GB.GCA.001316325.1.protein:794.88500,RS.GCF.000828575.1.protein:794.8  
8500)Node\_1070:335.28800)Node\_1069:770.33800)Node\_1068:1017.09000)Node  
\_1066:177.05700)Node\_1063:146.85500,  
((((GB.GCA.002067865.1.protein:1451.98000,RS.GCF.000404225.1.protein:1  
451.98000)Node\_1060:900.20900,(RS.GCF.000025665.1.protein:1839.38000,  
(RS.GCF.900176435.1.protein:788.58700,RS.GCF.000011185.1.protein:788.5  
8700)Node\_1062:1050.79000)Node\_1061:512.80400)Node\_1059:208.59500,  
(GB.GCA.002498725.1.protein:726.47100,  
(GB.GCA.002501805.1.protein:571.90900,  
(GB.GCA.002503285.1.protein:462.37200,GB.GCA.002504905.1.protein:462.3  
7200)Node\_1054:109.53700)Node\_1053:154.56100)Node\_1052:511.21600,  
(GB.GCA.002720095.2.protein:1037.73000,  
(GB.GCA.003602415.1.protein:670.20000,  
(GB.GCA.002722135.1.protein:539.51700,  
(GB.GCA.002499195.1.protein:410.60700,GB.GCA.002494645.1.protein:410.6  
0700)Node\_1058:128.91100)Node\_1057:130.68300)Node\_1056:367.53200)Node\_  
1055:199.95400)Node\_1051:1323.09000)Node\_1050:408.60400,  
(GB.GCA.002011165.1.protein:2407.25000,  
(RS.GCF.000025505.1.protein:1845.97000,GB.GCA.002010305.1.protein:1845  
.97000)Node\_1049:561.28000)Node\_1048:238.34800,  
(GB.GCA.004212075.1.protein:2497.97000,  
(GB.GCA.001766815.1.protein:2132.55000,  
(RS.GCF.000063445.1.protein:1981.61000,  
(RS.GCF.000235565.1.protein:1785.78000,  
(RS.GCF.000685155.1.protein:1444.41000,GB.GCA.004212095.1.protein:1444  
.41000)Node\_1047:341.37200)Node\_1046:195.82500)Node\_1045:150.94400)Node  
\_1044:154.61800,  
(RS.GCF.000021965.1.protein:945.91400,RS.GCF.001571405.1.protein:945.  
91400)Node\_1040:1328514.35:1111.77000,  
(GB.GCA.002503845.1.protein:1017.66000,  
(RS.GCF.000334895.1.protein:580.07000,  
(RS.GCF.000230735.2.protein:410.52900,RS.GCF.900215575.1.protein:410.5  
2900)Node\_1043:169.54100)Node\_1042:437.58900)Node\_1041:1040.03000)Node  
\_1039:229.48200)Node\_1038:210.79900)Node\_1037:147.63000)Node\_1036:323.  
78700)Node\_1035:272.12600)Node\_1034:250.70000,  
((((GB.GCA.003144275.1.protein:2955.31000,GB.GCA.002728275.1.protein:29  
55.31000)Node\_1033:328.35200,(GB.GCA.001940655.1.protein:2188.14000,  
(GB.GCA.004524545.1.protein:2017.83000,GB.GCA.004524535.1.protein:2017  
.83000)Node\_1032:170.30900)Node\_1031:921.14800,  
(GB.GCA.004524565.1.protein:3027.12000,  
(GB.GCA.001940665.1.protein:2809.63000,  
(GB.GCA.005191415.1.protein:2199.31000,GB.GCA.005191425.1.protein:2199  
.31000)Node\_1030:610.31900)Node\_1029:217.48800)Node\_1028:82.17490)Node  
\_1027:3238.54:174.37400)Node\_1026:172.40400,

((RS.GCF.000011205.1.protein:2586.86000,  
(RS.GCF.000092185.1.protein:2336.20000,  
(RS.GCF.000017945.1.protein:2021.90000,RS.GCF.000223395.1.protein:2021  
.90000)Node\_102222381793.31:314.30100)Node\_1021:250.66000)Node\_1020:47  
1.11100,  
((GB.GCA.003649445.1.protein:2345.50000,GB.GCA.003649495.1.protein:234  
5.50000)Node\_1024:391.16100,  
(GB.GCA.002506515.1.protein:1737.33000,GB.GCA.000015805.1.protein:1737  
.33000)Node\_1025:999.33500)Node\_1023:321.30800)Node\_1019:236.55000,  
((GB.GCA.005888735.1.protein:2778.41000,RS.GCF.003589585.1.protein:277  
8.41000)Node\_1018:306.07700,  
((GB.GCA.000270325.1.protein:1866.06000,GB.GCA.003056285.1.protein:18  
66.06000)Node\_1017:324.34600,  
(GB.GCA.002898395.1.protein:1647.19000,GB.GCA.000494145.1.protein:1647  
.19000)Node\_1016:543.22300)Node\_1015:799.96800,  
(GB.GCA.002499005.1.protein:2578.20000,  
((GB.GCA.005877225.1.protein:2030.56000,  
(GB.GCA.002495315.1.protein:1823.94000,GB.GCA.002495905.1.protein:1823  
.94000)Node\_1014:206.61700)Node\_1013:298.47200,  
(GB.GCA.900248165.1.protein:1961.26000,  
(GB.GCA.002713325.1.protein:1676.22000,  
((GB.GCA.000802205.2.protein:1197.43000,  
(RS.GCF.000698785.1.protein:1015.03000,  
(GB.GCA.005877075.1.protein:871.24900,GB.GCA.003176995.1.protein:871.2  
4900)Node\_1012:143.78200)Node\_1011:182.39500)Node\_1010:350.76600,  
((GB.GCA.900177045.1.protein:745.26300,  
(GB.GCA.007280335.1.protein:537.17900,GB.GCA.013330055.1.protein:537.1  
7900)Node\_1009:208.08500)Node\_1008:257.95800,  
((RS.GCF.002787055.1.protein:227.97500,GB.GCA.002499525.1.protein:227.  
97500)Node\_996:585.02000,(GB.GCA.001443365.1.protein:674.57300,  
((GCA.902592435.1.AG-447-  
C19.genomic:143.00600,GB.GCA.001627235.1.protein:143.00600)Node\_1005:3  
59.67200,(73669.assembled:80.75760,  
(13609.assembled:62.03910,2513237066:62.03910)Node\_1007:18.71850)Node\_  
1006:421.92000)Node\_1004:100.12800,  
(GB.GCA.000200715.1.protein:526.73200,  
((RS.GCF.000220175.1.protein:120.62800,GB.GCA.000204585.1.protein:120.  
62800)Node\_1003:208.97000,(GB.GCA.000299365.1.protein:198.49400,  
(RS.GCF.000956175.1.protein:80.74880,RS.GCF.003175215.1.protein:80.748  
80)Node\_1002:117.74500)Node\_1001:131.10500)Node\_1000:197.13300)Node\_99  
9:76.07290)Node\_998:71.76730)Node\_997:138.42300)Node\_995:190.22600)Nod  
e\_994:544.97000)Node\_993:128.02800)Node\_992:285.04100)Node\_991:367.769  
00)Node\_990:249.16900)Node\_989:412.18000)Node\_988:94.10850)Node\_987:21  
0.03600)Node\_986:161.54600)Node\_985:36.14070)Node\_984:1164.31000,  
((GB.GCA.003641555.1.protein:3592.59000,  
(RS.GCF.000745455.1.protein:3133.99000,  
((RS.GCF.000504085.1.protein:2105.00000,RS.GCF.001990485.1.protein:210  
5.00000)Node\_983:421.77200,(GB.GCA.003538775.1.protein:2355.21000,  
(RS.GCF.000953715.1.protein:1949.11000,RS.GCF.002752635.1.protein:1949  
.11000)Node\_982:406.09400)Node\_981:171.56600)Node\_980:607.21800)Node\_9

79:458.60200)Node\_978:626.07900,  
( (GB.GCA.001443005.1.protein:3847.94000,  
( (GB.GCA.001508935.1.protein:2125.80000,RS.GCF.900129645.1.protein:212  
5.80000)Node\_977:143.17300, (RS.GCF.000233775.1.protein:1987.29000,  
( (RS.GCF.000025885.1.protein:1472.03000,RS.GCF.000237805.1.protein:147  
2.03000)Node\_976:322.27800, (RS.GCF.000526375.1.protein:1572.05000,  
(GB.GCA.002432945.1.protein:1377.02000,RS.GCF.001701045.1.protein:1377  
.02000)Node\_975:195.03800)Node\_974:222.25400)Node\_973:192.98000)Node\_9  
72:281.68700)Node\_971:1578.97000)Node\_970:360.58500,  
( ( (RS.GCF.000184705.1.protein:3673.79000,  
( (RS.GCF.000621445.1.protein:1376.09000,  
(RS.GCF.003815035.1.protein:1041.75000,  
(RS.GCF.000798955.1.protein:896.20900,  
(RS.GCF.000313915.1.protein:354.06200,RS.GCF.000392875.1.protein:354.0  
6200)Node\_962:542.14700)Node\_961:145.54100)Node\_960:334.34200)Node\_959  
:1727.99000,  
( (GB.GCA.002407935.1.protein:2676.15000,GB.GCA.002411145.1.protein:267  
6.15000)Node\_969:319.35200,  
( (RS.GCF.000213255.1.protein:2122.30000,GB.GCA.002426575.1.protein:212  
2.30000)Node\_965:206.53200, (RS.GCF.900142285.1.protein:2112.79000,  
(RS.GCF.002874775.1.protein:1479.97000,  
(RS.GCF.900167005.1.protein:1292.80000,RS.GCF.003460745.1.protein:1292  
.80000)Node\_968:187.16700)Node\_967:632.82200)Node\_966:216.03800)Node\_9  
64:666.67100)Node\_963:108.58400)Node\_958:569.70300)Node\_957:316.68100,  
( ( (GB.GCA.003134215.1.protein:2727.81000,GB.GCA.002431715.1.protein:2  
727.81000)Node\_956:352.86100, (GB.GCA.002898555.1.protein:2600.76000,  
(GB.GCA.003577165.1.protein:2006.13000,GB.GCA.002162095.1.protein:2006  
.13000)Node\_955:594.63400)Node\_954:479.91200)Node\_953:329.56000,  
( (GB.GCA.002898575.1.protein:3057.90000,  
(RS.GCF.002973605.1.protein:2634.10000,GB.GCA.001872605.1.protein:2634  
.10000)Node\_952:423.80300)Node\_951:213.44200,  
(GB.GCA.002305165.1.protein:2912.87000,  
(GB.GCA.003170595.1.protein:2071.85000,GB.GCA.003542955.1.protein:2071  
.85000)Node\_950:841.01700)Node\_949:358.47600)Node\_948:138.88800)Node\_9  
47:501.86800,  
( (RS.GCF.900175965.1.protein:3359.59000,GB.GCA.002305585.1.protein:335  
9.59000)Node\_932:88.05060, ( (RS.GCF.003386795.1.protein:1770.31000,  
(RS.GCF.001660485.1.protein:1526.93000,  
(RS.GCF.000701365.1.protein:1225.54000,RS.GCF.002926165.1.protein:1225  
.54000)Node\_946:301.39400)Node\_945:243.38000)Node\_944:1184.10000,  
( ( (GB.GCA.002418265.1.protein:1157.34000,GB.GCA.002450985.1.protein:11  
57.34000)Node\_943:602.50200, (GB.GCA.002897675.1.protein:1557.77000,  
(GB.GCA.003388545.1.protein:957.12000,GB.GCA.003242515.1.protein:957.1  
2000)Node\_942:600.64700)Node\_941:202.07100)Node\_940:851.03600,  
(GB.GCA.002352645.1.protein:2368.01000,  
( (RS.GCF.000949295.1.protein:1283.02000,GB.GCA.003151475.1.protein:128  
3.02000)Node\_939:334.51800, (GB.GCA.004366205.1.protein:1367.48000,  
(GCA.902570085.1.AG-414-  
N20.genomic:544.67500,GB.GCA.002687745.1.protein:544.67500)Node\_938:82  
2.80400)Node\_937:250.06200)Node\_936:750.46500)Node\_935:242.86900)Node\_

934:343.53700)Node\_933:493.22700)Node\_931:464.46300)Node\_930:78.36840)  
Node\_929:54.96420,  
(((GB.GCA.002747975.1.protein:1196.07000,RS.GCF.002761215.1.protein:1  
196.07000)Node\_928:1791.29000,(GB.GCA.001818315.1.protein:2615.70000,  
(GB.GCA.003551435.1.protein:2032.36000,  
(GB.GCA.001189155.1.protein:963.12100,GB.GCA.003504275.1.protein:963.1  
2100)Node\_927:1069.24000)Node\_926:583.34100)Node\_925:371.65800)Node\_92  
4:845.86500,((GB.GCA.001898225.1.protein:3379.56000,  
(GB.GCA.004295045.1.protein:2791.17000,  
(GB.GCA.001567485.1.protein:2075.92000,GB.GCA.001796335.1.protein:2075  
.92000)Node\_923:715.24600)Node\_922:588.38900)Node\_921:87.81110,  
(GB.GCA.004377275.1.protein:3055.65000,  
(GB.GCA.003523055.1.protein:2457.83000,((GCA.902588795.1.AG-439-  
D18.genomic:2238.29000,GB.GCA.003228195.2.protein:2238.29000)Node\_920:  
139.49400,  
((GB.GCA.002711005.1.protein:1644.97000,GB.GCA.002719675.1.protein:164  
4.97000)Node\_919:400.94200,((GB.GCA.002238855.1.protein:1646.20000,  
(GB.GCA.002313895.1.protein:1014.50000,GB.GCA.002328865.1.protein:1014  
.50000)Node\_918:631.70800)Node\_917:211.77400,  
(GB.GCA.002721445.1.protein:1570.30000,  
(GB.GCA.002696685.1.protein:890.29100,  
(GB.GCA.002717465.1.protein:749.18000,(GCA.902578465.1.AG-426-  
M11.genomic:660.02400,GB.GCA.002728195.1.protein:660.02400)Node\_916:89  
.15670)Node\_915:141.11100)Node\_914:680.01100)Node\_913:287.67400)Node\_9  
12:187.93500)Node\_911:331.87700)Node\_910:80.04140)Node\_909:597.82100)N  
ode\_908:411.71700)Node\_907:365.85400)Node\_906:170.90200,  
(((GB.GCA.001771535.1.protein:2102.18000,GB.GCA.001771585.1.protein:2  
102.18000)Node\_905:471.14900,  
(GB.GCA.001771545.1.protein:2139.63000,GB.GCA.001771575.1.protein:2139  
.63000)Node\_904:433.70000)Node\_903:866.17100,  
((GB.GCA.003242895.1.protein:2889.54000,GB.GCA.003864475.1.protein:288  
9.54000)Node\_902:126.98900,  
((GB.GCA.003265975.1.protein:1804.63000,GB.GCA.003265885.1.protein:180  
4.63000)Node\_900:385.14700,  
(GB.GCA.002433595.1.protein:1993.43000,GB.GCA.002296285.1.protein:1993  
.43000)Node\_901:196.34700)Node\_899:826.74500)Node\_898:422.97700)Node\_8  
97:339.46700,((GB.GCA.003503675.1.protein:3341.88000,  
(GB.GCA.005110385.1.protein:2554.72000,GB.GCA.001899315.1.protein:2554  
.72000)Node\_859:787.15700)Node\_858:136.61800,  
(RS.GCF.000011385.1.protein:2690.67000,  
(RS.GCF.000013205.1.protein:2237.63000,  
((GB.GCA.003242085.1.protein:408.20400,GB.GCA.003249035.1.protein:408.  
20400)Node\_896:1516.77000,(RS.GCF.002754935.1.protein:1799.37000,  
(RS.GCF.001939115.1.protein:1546.46000,  
(RS.GCF.001870905.1.protein:1197.11000,RS.GCF.000014265.1.protein:119  
7.11000)Node\_895:137.94000,(RS.GCF.000317635.1.protein:1027.98000,  
(GB.GCA.000252485.1.protein:847.77000,  
(RS.GCF.000332035.1.protein:744.91000,  
(RS.GCF.000167195.1.protein:215.76200,  
(RS.GCF.000169335.1.protein:86.81450,RS.GCF.000017845.1.protein:86.814

50)Node\_894:128.94700)Node\_893:529.14800)Node\_892:102.85900)Node\_891:180.21200)Node\_890:307.07000)Node\_889:211.40400)Node\_888:137.14000,  
(RS.GCF.000010065.1.protein:1298.37000,  
(GB.GCA.001007665.1.protein:671.94600,  
(RS.GCF.003011125.1.protein:528.51700,  
((RS.GCF.003011885.1.protein:331.39200,  
(GB.GCA.000708525.1.protein:126.05400,  
(RS.GCF.000316515.1.protein:17.41410,RS.GCF.003003925.1.protein:17.41410)Node\_887:108.64000)Node\_886:205.33800)Node\_885:98.67740,  
((RS.GCF.000011485.1.protein:214.92600,  
(RS.GCF.000018585.1.protein:136.70000,  
((RS.GCF.000012465.1.protein:19.13060,GB.GCA.003279655.1.protein:19.13060)Node\_876:84.11830,(RS.GCF.000015665.1.protein:20.96900,  
(RS.GCF.000012645.1.protein:8.44350,  
(RS.GCF.000015965.1.protein:4.77420,RS.GCF.000018065.1.protein:4.77420)Node\_875:3.66930)Node\_874:12.52550)Node\_873:82.27990)Node\_872:33.45110)Node\_871:78.22620)Node\_870:48.67780,  
((RS.GCF.004209775.1.protein:128.37800,RS.GCF.000153825.1.protein:128.37800)Node\_880:41.26860,  
(RS.GCF.000014585.1.protein:141.28400,RS.GCF.000063505.1.protein:141.28400)Node\_879:28.36230)Node\_878:54.89610,  
(RS.GCF.000195975.1.protein:125.24600,  
(RS.GCF.000153805.1.protein:96.75660,  
(RS.GCF.000737595.1.protein:22.80130,  
(RS.GCF.000012625.1.protein:13.24870,RS.GCF.900474085.1.protein:13.24870)Node\_884:9.55260)Node\_883:73.95520)Node\_882:28.48930)Node\_881:99.29660)Node\_877:39.06160)Node\_869:166.46500)Node\_868:98.44740)Node\_867:143.42900)Node\_866:626.42600)Node\_865:385.22400)Node\_864:115.77700)Node\_863:125.60000)Node\_862:312.65800)Node\_861:453.04200)Node\_860:787.82300)Node\_857:300.47400)Node\_856:225.15500)Node\_855:41.30970)Node\_854:76.13320,(((GB.GCA.004297825.1.protein:3180.94000,  
(GB.GCA.003695005.1.protein:2749.94000,  
(RS.GCF.000017685.1.protein:2345.45000,RS.GCF.000243335.1.protein:2345.45000)Node\_853:404.49100)Node\_852:430.99500)Node\_851:403.32800,  
((GB.GCA.001829155.1.protein:2988.28000,GB.GCA.002450905.1.protein:2988.28000)Node\_850:338.84000,(GB.GCA.001829125.1.protein:2866.93000,  
(GB.GCA.002238925.1.protein:2248.85000,  
((GB.GCA.002307015.1.protein:1495.10000,  
(RS.GCF.000219725.1.protein:1305.85000,GB.GCA.001829185.1.protein:1305.85000)Node\_845:189.24900)Node\_844:517.99200,  
(RS.GCF.000758165.1.protein:1845.51000,  
((GB.GCA.003641695.1.protein:1330.62000,RS.GCF.000378205.1.protein:1330.62000)Node\_848:167.51700,  
(GB.GCA.007116075.1.protein:1205.22000,RS.GCF.000190435.1.protein:1205.22000)Node\_849:292.91400)Node\_847:347.38000)Node\_846:167.58300)Node\_843:235.75700)Node\_842:618.08100)Node\_841:460.18900)Node\_840:257.14300)Node\_839:387.88700,(((GB.GCA.003695705.1.protein:2802.56000,  
((GB.GCA.002684655.1.protein:1966.88000,  
(GB.GCA.002748355.1.protein:1281.94000,GB.GCA.002685965.1.protein:1281.94000)Node\_767:684.94000)Node\_766:421.97600,

((GB.GCA.004295085.1.protein:1076.67000,  
((GB.GCA.002705055.1.protein:758.59600,GB.GCA.002746235.1.protein:758.  
59600)Node\_760:173.71100,  
(GB.GCA.003696625.1.protein:722.89900,GB.GCA.002500505.1.protein:722.8  
9900)Node\_759:209.40800)Node\_758:144.35900)Node\_757:1062.92000,  
((GB.GCA.002683825.1.protein:1282.83000,GB.GCA.004296785.1.protein:128  
2.83000)Node\_762:156.79500,(GB.GCA.005799545.1.protein:1301.94000,  
(GB.GCA.002686265.1.protein:1167.45000,  
(GB.GCA.002686945.1.protein:979.70600,GB.GCA.002686595.1.protein:979.7  
0600)Node\_765:187.74500)Node\_764:134.48600)Node\_763:1548.82:137.69100)N  
ode\_761:699.95900)Node\_756:249.27400)Node\_755:413.69900)Node\_754:960.1  
5200,  
(((GB.GCA.002787155.1.protein:2265.34000,GB.GCA.001804285.1.protein:22  
65.34000)Node\_781:1142.47000,((GB.GCA.002787095.1.protein:3091.98000,  
(GB.GCA.002771475.1.protein:2856.56000,  
(GB.GCA.003141835.1.protein:2646.27000,  
(GB.GCA.002780005.1.protein:2305.14000,GB.GCA.001804165.1.protein:2305  
.14000)Node\_780:341.12700)Node\_779:210.29600)Node\_778:235.41700)Node\_7  
77:70.08060,(GB.GCA.003645805.1.protein:2977.37000,  
((GB.GCA.003644445.1.protein:1448.28000,GB.GCA.003154195.1.protein:144  
8.28000)Node\_773:1013.21000,  
((GB.GCA.002796125.1.protein:2004.24000,GB.GCA.003598135.1.protein:200  
4.24000)Node\_775:284.23000,  
(GB.GCA.002753745.1.protein:1242.34000,GB.GCA.003522725.1.protein:1242  
.34000)Node\_776:1046.13000)Node\_774:173.02700)Node\_772:515.87700)Node\_  
771:184.69200)Node\_770:245.75500)Node\_769:290.26800,  
(RS.GCF.000204255.1.protein:3385.12000,  
((GB.GCA.002405835.1.protein:2969.40000,  
(RS.GCF.001017655.1.protein:2323.59000,GB.GCA.003566475.1.protein:232  
3.59000)Node\_794:275.86500,  
(GB.GCA.002448475.1.protein:2200.22000,GB.GCA.001803315.1.protein:2200  
.22000)Node\_795:399.23300)Node\_793:369.94400)Node\_792:93.59880,  
((GB.GCA.001872735.1.protein:1771.54000,GB.GCA.002500665.1.protein:177  
1.54000)Node\_791:1031.20000,  
((GB.GCA.002422425.1.protein:2062.01000,GB.GCA.002452515.1.protein:206  
2.01000)Node\_790:605.79900,(GB.GCA.003695015.1.protein:2049.73000,  
((GB.GCA.002690655.1.protein:1516.05000,GB.GCA.002715965.1.protein:151  
6.05000)Node\_788:252.81000,  
(GB.GCA.003219345.1.protein:1629.93000,GB.GCA.005809105.1.protein:1629  
.93000)Node\_789:138.92800)Node\_787:280.87600)Node\_786:618.07600)Node\_7  
85:134.93100)Node\_784:260.25500)Node\_783:322.12100)Node\_782:312.96800)  
Node\_768:64.62680)Node\_753:119.43200,  
((GB.GCA.002780205.1.protein:3015.46000,  
(((GB.GCA.001871125.1.protein:1776.48000,GB.GCA.001800285.1.protein:17  
76.48000)Node\_802:882.46800,(GB.GCA.002841695.1.protein:2416.39000,  
(RS.GCF.002355835.1.protein:1893.42000,GB.GCA.001800315.1.protein:1893  
.42000)Node\_801:522.97700)Node\_800:242.56000)Node\_799:172.39600,  
((GB.GCA.003452935.1.protein:1797.02000,GB.GCA.001799575.1.protein:179  
7.02000)Node\_807:826.88900,  
((GB.GCA.001800075.1.protein:2227.36000,GB.GCA.003140895.1.protein:222

7.36000)Node\_805:227.36300,  
(GB.GCA.001800095.1.protein:1532.54000,GB.GCA.001800135.1.protein:1532  
.54000)Node\_806:922.17900)Node\_804:169.18900)Node\_803:207.43500)Node\_7  
98:184.11200)Node\_797:808.79000,  
((GB.GCA.001509335.1.protein:2560.29000,  
(GB.GCA.003645825.1.protein:1678.55000,GB.GCA.002347855.1.protein:1678  
.55000)Node\_827:881.74100)Node\_826:186.36800,  
((GB.GCA.002689995.1.protein:1413.36000,  
(GB.GCA.002717625.1.protein:1194.27000,  
(GB.GCA.002705575.1.protein:1041.60000,GB.GCA.002703645.1.protein:1041  
.60000)Node\_838:152.66300)Node\_837:219.09800)Node\_836:826.67300,  
((GB.GCA.002329125.1.protein:1151.07000,GB.GCA.002471705.1.protein:115  
1.07000)Node\_835:718.32100,((GCA.902538565.1.AG-899-  
G06.genomic:185.16100,GCA.902629855.1.AH-324-  
M03.genomic:185.16100)Node\_831:1314.97000,  
(GB.GCA.001577055.1.protein:1361.48000,  
(GB.GCA.002701785.1.protein:1202.67000,(GCA.902615915.1.AG-892-  
A09.genomic:708.15200,GB.GCA.002724735.1.protein:708.15200)Node\_834:49  
4.52100)Node\_833:158.80400)Node\_832:138.65300)Node\_830:369.26100)Node\_  
829:370.64700)Node\_828:506.62300)Node\_825:638.56700,  
((RS.GCF.001535965.1.protein:2910.52000,  
(GB.GCA.001803165.1.protein:2662.89000,  
(GB.GCA.001899175.1.protein:1565.95000,GB.GCA.004292595.1.protein:1565  
.95000)Node\_812:1096.94000)Node\_811:247.62500)Node\_810:188.58100,  
((RS.GCF.003353065.1.protein:2241.70000,RS.GCF.003285105.1.protein:224  
1.70000)Node\_824:333.91700,((RS.GCF.000430505.1.protein:1340.04000,  
(RS.GCF.000014145.1.protein:1123.41000,RS.GCF.001611675.1.protein:1123  
.41000)Node\_823:216.62800)Node\_822:405.75000,  
((RS.GCF.000275825.1.protein:1172.15000,GB.GCA.001897535.1.protein:117  
2.15000)Node\_821:363.19400,(GB.GCA.002483345.1.protein:1390.19000,  
(GB.GCA.001769385.1.protein:1097.93000,  
(GB.GCA.007119395.1.protein:977.63700,  
(GB.GCA.002393195.1.protein:770.82300,  
(GB.GCA.003851245.1.protein:521.19500,GB.GCA.900319235.1.protein:521.1  
9500)Node\_820:249.62800)Node\_819:206.81400)Node\_818:120.29100)Node\_817  
:292.26000)Node\_816:145.15600)Node\_815:210.44300)Node\_814:829.83300)No  
de\_813:523.47700)Node\_809:286.12900)Node\_808:439.02300)Node\_796:57.894  
10)Node\_752:53.10310,((RS.GCF.003633715.1.protein:2889.78000,  
(RS.GCF.000021545.1.protein:1712.06000,  
(GB.GCA.003972855.1.protein:1189.51000,  
(RS.GCF.003664005.1.protein:919.01900,RS.GCF.000020785.1.protein:919.0  
1900)Node\_751:270.49400)Node\_750:522.54500)Node\_749:1177.72000)Node\_74  
8:772.75500,(RS.GCF.000517565.1.protein:3174.11000,  
(RS.GCF.000021725.1.protein:1486.44000,  
(RS.GCF.000010325.1.protein:1116.72000,  
(GB.GCA.003945285.1.protein:925.96300,  
((RS.GCF.900187115.1.protein:646.50200,GB.GCA.002424475.1.protein:646  
.50200)Node\_747:82.91880,  
(RS.GCF.000147355.1.protein:560.60700,GB.GCA.000276965.1.protein:560.6  
0700)Node\_746:168.81400)Node\_745:66.30880,

((RS.GCF.900637395.1.protein:532.83500,RS.GCF.000024885.1.protein:532.83500)Node\_744:172.83100,(RS.GCF.000259255.1.protein:611.42900,(GB.GCA.003561815.1.protein:493.24400,GB.GCA.002428055.1.protein:493.24400)Node\_743:118.18500)Node\_742:94.23720)Node\_741:90.06360)Node\_740:130.23300)Node\_739:190.75600)Node\_738:369.72000)Node\_737:18101135.26:1687.67000)Node\_736:488.42900)Node\_735:194.31700,(GB.GCA.002402325.1.protein:3328.84000,(RS.GCF.000428885.1.protein:2955.27000,GB.GCA.003650445.1.protein:2955.27000)Node\_734:299.07200,(GB.GCA.002898535.1.protein:2826.42000,(GB.GCA.003141555.1.protein:1882.24000,GB.GCA.002010665.1.protein:1882.24000)Node\_733:944.18300)Node\_732:291.19600,(GB.GCA.005223145.1.protein:2787.51000,GB.GCA.002722645.1.protein:2787.51000)Node\_725:195.69000,(GB.GCA.003223145.1.protein:2799.39000,(GB.GCA.001767495.1.protein:2310.29000,(GB.GCA.003223555.1.protein:2084.27000,GB.GCA.004356105.1.protein:2084.27000)Node\_729:226.01900)Node\_728:254.84600,(GB.GCA.003225315.1.protein:1975.42000,(GB.GCA.003140235.1.protein:1712.46000,GB.GCA.004299485.1.protein:1712.46000)Node\_731:262.96000)Node\_730:589.72100)Node\_727:234.24700)Node\_726:183.81000)Node\_724:134.42400)Node\_723:136.72400)Node\_722:74.50010)Node\_721:378.07600,(((GB.GCA.002238965.1.protein:434.67800,GB.GCA.002377645.1.protein:434.67800)Node\_720:1069.79000,(GB.GCA.001803565.1.protein:1351.72000,(GB.GCA.002500605.1.protein:1192.25000,(GB.GCA.002787235.1.protein:498.51200,RS.GCF.000341545.2.protein:498.51200)Node\_719:615.33300,(GB.GCA.001804915.1.protein:960.61300,GB.GCA.003229375.1.protein:960.61300)Node\_718:153.23200)Node\_717:78.40840)Node\_716:159.46300)Node\_848:152.74800)Node\_714:821.77900,((GB.GCA.002897915.1.protein:893.06900,GB.GCA.002011735.1.protein:893.06900)Node\_713:353.57200,(GB.GCA.003235715.1.protein:1185.43000,(GB.GCA.002897855.1.protein:897.90400,GB.GCA.002011745.1.protein:897.90400)Node\_712:134.28200,(GB.GCA.001871685.1.protein:935.74600,(RS.GCF.000020985.1.protein:731.84500,(GB.GCA.001803635.1.protein:507.99200,GB.GCA.002753335.1.protein:507.99200)Node\_711:223.85300)Node\_710:203.90200)Node\_709:96.43970)Node\_708:153.24000)Node\_707:61.21410)Node\_706:510.93800,(RS.GCF.000299235.1.protein:1538.51000,(GB.GCA.001805205.1.protein:1487.82000,(GB.GCA.005239925.1.protein:937.23800,GB.GCA.004297235.1.protein:937.23800)Node\_705:360.16300,(GB.GCA.004298335.1.protein:924.81800,(GB.GCA.003695915.1.protein:761.82400,(GB.GCA.005877775.1.protein:468.37600,GB.GCA.004296885.1.protein:468.37600)Node\_704:86.21380,(RS.GCF.000196815.1.protein:367.53800,(RS.GCF.001458695.1.protein:215.73800,(RS.GCF.001458735.1.protein:104.59000,RS.GCF.001458775.1.protein:104.59000)Node\_703:111.14800)Node\_702:151.80000)Node\_701:187.05200)Node\_700:207.23400)Node\_699:162.99300)Node\_698:372.58300)Node\_697:190.41800)Node\_696:50.68830)Node\_695:219.07100)Node\_694:568.66500)Node\_693:1086.96000,



(((((RS.GCF.900142125.1.protein:1540.63000,RS.GCF.000012885.1.protein:1540.63000)Node\_658:1199.89000,(GB.GCA.002782605.1.protein:2559.78000,(GB.GCA.001595385.3.protein:1829.41000,GB.GCA.001797495.1.protein:1829.41000)Node\_660:730.37300)Node\_659:180.73700)Node\_657:120.25400,(RS.GCF.000092205.1.protein:2303.95000,(RS.GCF.000174435.1.protein:2155.51000,(RS.GCF.000217795.1.protein:1841.35000,GB.GCA.002419025.1.protein:1841.35000)Node\_664:314.15900)Node\_663:148.43600)Node\_662:184.68300,(RS.GCF.000195295.1.protein:2400.14000,(GB.GCA.001874005.1.protein:2123.90000,(GB.GCA.002753225.1.protein:1309.85000,(GB.GCA.000961655.1.protein:1109.00000,(RS.GCF.000472805.1.protein:960.24500,GB.GCA.003973265.1.protein:960.24500)Node\_669:148.75200)Node\_668:200.84800)Node\_667:814.05600)Node\_666:276.23500)Node\_665:88.49480)Node\_661:372.14000)Node\_656:93.74520,(((GB.GCA.002787535.1.protein:2352.67000,GB.GCA.002343185.1.protein:2352.67000)Node\_680:160.67300,(RS.GCF.001748245.1.protein:1771.06000,GB.GCA.001907975.2.protein:1771.06000)Node\_1046:742.28700)Node\_678:121.75600,(GB.GCA.001797335.1.protein:2332.61000,(GB.GCA.002778785.1.protein:1237.22000,(RS.GCF.002208115.1.protein:999.17300,GB.GCA.002321895.1.protein:999.17300)Node\_675:238.05000)Node\_674:988.29100,(GB.GCA.002786715.1.protein:1950.50000,(GB.GCA.001769805.1.protein:1331.89000,GB.GCA.002387735.1.protein:1331.89000)Node\_677:618.60300)Node\_676:275.01700)Node\_673:107.09800)Node\_672:302.49100)Node\_671:172.56600,(GB.GCA.002433485.1.protein:1933.06000,GB.GCA.002343455.1.protein:1933.06000)Node\_692:681.89100,((GB.GCA.002721815.1.protein:2294.96000,(GB.GCA.007120035.1.protein:2128.96000,(GB.GCA.002863065.1.protein:1767.46000,GB.GCA.006226565.1.protein:1767.46000)Node\_691:361.50300)Node\_690:165.99400)Node\_689:191.04700,(GB.GCA.003242475.1.protein:1836.45000,(RS.GCF.000022145.1.protein:1433.38000,GB.GCA.002408385.1.protein:1433.38000)Node\_685:403.07100)Node\_684:498.10100,(GB.GCA.003158455.1.protein:1911.14000,GB.GCA.001464385.1.protein:1911.14000)Node\_688:253.37300,(RS.GCF.001931505.1.protein:1723.96000,GB.GCA.002320815.1.protein:1723.96000)Node\_687:440.55600)Node\_686:170.03800)Node\_683:151.45400)Node\_682:128.94900)Node\_681:192.71600)Node\_1064:146.84700)Node\_6553099.62:138.79400,((GB.GCA.002683655.1.protein:1851.28000,(GB.GCA.002726945.1.protein:1470.87000,(GB.GCA.001469005.2.protein:333.81600,GB.GCA.002683785.1.protein:333.81600)Node\_654:953.93800,(GB.GCA.001627865.1.protein:606.49200,(GB.GCA.002082305.1.protein:442.90600,GB.GCA.002685535.1.protein:442.90600)Node\_653:163.58600)Node\_652:681.26300)Node\_651:183.11800)Node\_650:380.40700)Node\_649:1127.46000,(((GB.GCA.003233235.1.protein:1042.76000,GB.GCA.002779605.1.protein:1042.76000)Node\_585:693.01300,(GB.GCA.002791545.1.protein:1184.46000,RS.GCF.000744415.1.protein:118

4.46000)Node\_587:226.91900,  
(RS.GCF.005818865.1.protein:952.67300,RS.GCF.003665155.1.protein:952.67300)Node\_588:458.70900)Node\_586:324.38900)Node\_584:949.48500,  
(RS.GCF.000175575.2.protein:2188.45000,  
(RS.GCF.000011705.1.protein:1968.43000,  
((RS.GCF.003333315.1.protein:1592.49000,GB.GCA.002420425.1.protein:1592.49000)Node\_583:275.26900,(GB.GCA.003251535.1.protein:1672.69000,  
((RS.GCF.000828835.1.protein:1364.95000,  
(GB.GCA.003250975.1.protein:1145.61000,GB.GCA.002170535.1.protein:1145.61000)Node\_582:219.34000)Node\_581:199.47400,  
((RS.GCF.004364935.1.protein:1090.41000,RS.GCF.000772705.2.protein:1090.41000)Node\_580:252.06600,(GB.GCA.000531125.1.protein:1265.23000,  
(RS.GCF.004684205.1.protein:1141.83000,  
(GB.GCA.001914695.1.protein:859.23400,GB.GCA.003567475.1.protein:859.23400)Node\_579:282.59600)Node\_578:123.40500)Node\_577:77.24360)Node\_576:161.94900,(GB.GCA.003696905.1.protein:1368.72000,  
((GB.GCA.002101225.1.protein:1065.35000,GB.GCA.002733715.1.protein:1065.35000)Node\_575:86.95500,  
(RS.GCF.900180345.1.protein:877.27600,RS.GCF.004001325.1.protein:877.27600)Node\_574:275.02900)Node\_573:113.94500,  
((RS.GCF.002211785.1.protein:957.92500,RS.GCF.000297215.2.protein:957.92500)Node\_572:180.67000,(RS.GCF.001558495.2.protein:1043.42000,  
(RS.GCF.001457615.1.protein:887.29000,((GCA.902593675.1.AG-447-I15.genomic:187.73400,(GCA.902594515.1.AG-447-K20.genomic:133.88100,GCA.902600705.1.AG-917-C02.genomic:133.88100)Node\_571:53.85350)Node\_570:309.32100,  
(GCA.902582615.1.AG-912-C22.genomic:361.50900,(GCA.902616715.1.AG-892-C21.genomic:235.42900,GCA.902594855.1.AG-915-K19.genomic:235.42900)Node\_569:126.08000)Node\_568:135.54700)Node\_567:271.73900,(GB.GCA.002469845.1.protein:412.26100,  
(GB.GCA.002378645.1.protein:280.49700,  
((RS.GCF.000511875.1.protein:138.84900,GB.GCA.001438605.1.protein:138.84900)Node\_566:73.43060,(GB.GCA.002335945.1.protein:173.57700,  
(GB.GCA.004211905.1.protein:107.15300,GB.GCA.002382445.1.protein:107.15300)Node\_565:66.42420)Node\_564:38.70210)Node\_563:68.21710)Node\_562:131.76400)Node\_561:356.53300)Node\_560:118.49600)Node\_559:156.13300)Node\_558:95.17260)Node\_557:125.11:127.65500)Node\_556:102.46800)Node\_555:135.71000)Node\_554:59.99330)Node\_553:108.26900)Node\_552:195.07100)Node\_551:100.67200)Node\_550:220.01700)Node\_549:496.80700)Node\_548:78.42080,  
((RS.GCF.002109495.1.protein:2109.71000,  
(GB.GCA.002753665.1.protein:1826.27000,  
(GB.GCA.002753565.1.protein:1469.64000,  
(RS.GCF.004217665.1.protein:280.85400,GB.GCA.002753135.1.protein:280.85400)Node\_648:1188.78000)Node\_647:356.63700)Node\_646:283.43300)Node\_645:548.55300,(GB.GCA.003450915.1.protein:2381.93000,  
((GB.GCA.002715505.1.protein:1889.58000,  
(GB.GCA.002167825.1.protein:1743.61000,  
(GB.GCA.002938255.1.protein:1579.05000,((GCA.902567835.1.AG-414-E02.genomic:789.71000,(GCA.902515705.1.AG-325-E20.genomic:399.36200,  
(GCA.902535465.1.AG-349-D08.genomic:230.39100,GCA.902609855.1.AG-917-

K20.genomic:230.39100)Node\_598:168.97100)Node\_597:390.34800)Node\_596:86.48870, ((GCA.902576855.1.AG-426-E17.genomic:381.55300,RS.GCF.001180105.1.protein:381.55300)Node\_609:161.30100, (GCA.902574695.1.AG-422-N15.genomic:464.15800, ((GCA.902617415.1.AG-892-F15.genomic:252.26900, (GCA.902605865.1.AG-461-L09.genomic:104.50700,GCA.902583075.1.AG-912-G22.genomic:104.50700)Node\_603:147.76200)Node\_602:140.32800, (GCA.902569405.1.AG-414-L04.genomic:314.16700, (GCA.902579985.1.AG-430-B09.genomic:175.20900, (RS.GCF.001179925.1.protein:112.06500, (GCA.902555725.1.AG-390-D15.genomic:94.25140, (RS.GCF.000701385.1.protein:51.74680,RS.GCF.000504225.1.protein:51.74680)Node\_608:42.50450)Node\_607:17.81350)Node\_606:63.14400)Node\_605:138.95800)Node\_604:78.43030)Node\_601:71.56090)Node\_600:78.69660)Node\_599:333.34400)Node\_595:702.85200)Node\_594:164.56300)Node\_593:145.96500)Node\_592:278.87700, ((GB.GCA.002695035.1.protein:1957.90000, (GB.GCA.900551585.1.protein:1850.94000,GB.GCA.002389385.1.protein:1850.94000)Node\_644:106.95700)Node\_643:102.78400, ((GB.GCA.002694385.1.protein:1743.29000, (RS.GCF.003173035.1.protein:1626.50000, (GB.GCA.003248505.1.protein:1520.88000, (((GB.GCA.003164925.1.protein:1072.40000,GB.GCA.002307725.1.protein:1072.40000)Node\_621:174.30300, (RS.GCF.000007125.1.protein:1089.10000,GB.GCA.002715765.1.protein:1089.10000)Node\_620:157.60200)Node\_619:110.12300, (RS.GCF.000170875.1.protein:351.35200, (RS.GCF.000152965.1.protein:238.60500, (RS.GCF.000014045.1.protein:124.79800,RS.GCF.005887615.1.protein:124.79800)Node\_618:113.80700)Node\_617:112.74700)Node\_616:1005.48000)Node\_615:164.05400)Node\_614:105.61400)Node\_613:116.79500)Node\_612:167.17500, ((GB.GCA.001767835.1.protein:1731.65000, (RS.GCF.000283655.1.protein:1586.39000, (RS.GCF.002723915.1.protein:1293.35000,GB.GCA.004297265.1.protein:1293.35000)Node\_642:293.03800)Node\_641:145.25900)Node\_640:83.26410, ((GB.GCA.002724635.1.protein:1568.34000, (GB.GCA.002709075.1.protein:1417.11000,GB.GCA.002501105.1.protein:1417.11000)Node\_625:151.23000)Node\_624:164.54800, ((GB.GCA.002709955.1.protein:1524.91000,RS.GCF.900100655.1.protein:1524.91000)Node\_639:136.10700, (RS.GCF.900102465.1.protein:1405.09000, ((GB.GCA.003278095.1.protein:277.22300, (GCA.902619615.1.AG-892-007.genomic:151.37600, (GCA.902623995.1.AG-893-P05.genomic:112.07100,GCA.902625215.1.AH-287-L13.genomic:112.07100)Node\_638:39.30530)Node\_637:125.84600)Node\_636:781.75700, ((GCA.902625725.1.AH-287-021.genomic:628.05900, (GB.GCA.002387605.1.protein:505.14700, (RS.GCF.000238815.1.protein:253.90300,GB.GCA.002348585.1.protein:253.90300)Node\_632:251.24400)Node\_631:122.91200)Node\_630:214.15400, (GB.GCA.002457745.1.protein:592.95600, (GB.GCA.004212735.1.protein:484.16200, (RS.GCF.000024465.1.protein:375.73900,GB.GCA.003282865.1.protein:375.73900)Node\_635:108.42300)Node\_634:108.79400)Node\_633:249.25800)Node\_629

:216.76700)Node\_628:346.10500)Node\_627:255.93000)Node\_626:71.87400)Node\_623:82.02440)Node\_622:95.55410)Node\_611:150.21200)Node\_610:107.77600)Node\_591:213.47900)Node\_590:276.32600)Node\_589:105.41700)Node\_54728992663.26:215.06500)Node\_546:114.56800)Node\_545:319.89200)Node\_544:293.71800)Node\_543:149.93100)Node\_542:78.39540)Node\_541:36.90540)Node\_540:149.41600)Node\_539:86.95750)Node\_5384331.65:10.14590)Node\_537:437.84500);
